# Supplementary material
Source: Royal Society of Chemistry journal article supplement (doi:10.1039/d5nj04990c)
Supplement: d5nj04990c1.pdf [file d5nj04990c1.pdf]

## Electronic Supplementary Information for

BOSCHIBAs as a fluorescent dye of silk fibroin with mechano- and thermoresistive properties: ultrasound synthesis, photophysical characterization, X-ray analysis, and molecular docking

Marizé Hernández-Santana,<sup>a</sup> Marisol Ibarra-Rodríguez,<sup>a</sup> Blanca M. Muñoz-Flores,<sup>a</sup> Amy I. Espinoza-Pedroza,<sup>b</sup> Verónica Rivas,<sup>b</sup> Rosa Santillán,<sup>c</sup> David Morales-Morales,<sup>d</sup> Nicolás Puentes-Díaz,<sup>c</sup> Jorge Alí-Torres,<sup>c</sup> Víctor M. Jiménez-Pérez.<sup>a,\*</sup>

<sup>a</sup> Universidad Autónoma de Nuevo León, Facultad de Ciencias Químicas, Av. Pedro de Alba s/n, Ciudad Universitaria, C.P. 66451. San Nicolás de los Garza, Nuevo León, México. e-mail: [victor.jimenezpr@uanl.edu.mx](mailto:victor.jimenezpr@uanl.edu.mx)

<sup>b</sup> Universidad Autónoma de Nuevo León, Facultad de Medicina, Av. Dr. Eduardo Aguirre Pequeño, Nuevo León 64460, México

<sup>c</sup> Departamento de Química, Centro de Investigación y de Estudios Avanzados del IPN, A. P. 14-740, C. P. 07000 D. F., México.

<sup>d</sup> Instituto de Química, Universidad Nacional Autónoma de México, Circuito Exterior S/N, Ciudad Universitaria Coyoacán, México D.F., México

<sup>e</sup> Departamento de Química, Universidad Nacional de Colombia -Sede Bogotá, Bogotá DC, Colombia.

|                                                                                                                     |    |
|---------------------------------------------------------------------------------------------------------------------|----|
| <b>Table S1.</b> Synthesis parameters with ultrasonic radiation for the ligands and BOSCHIBAs, at room temperature. | 3  |
| <b>Table S2.</b> Physical properties of Ligands and BOSCHIBAs                                                       | 3  |
| <b>Table S3:</b> IR data in cm <sup>-1</sup> for ligands <b>1-4</b>                                                 | 5  |
| <b>Table S4:</b> IR data in cm <sup>-1</sup> of compounds <b>5-8</b>                                                | 7  |
| <b>Table S5.</b> Crystal data for compound <b>5</b>                                                                 | 24 |
| <b>Table S6.</b> Selected bond distances (Å) and bond angles (°) of <b>5</b>                                        | 25 |

|                                                      |   |
|------------------------------------------------------|---|
| <b>Figure S1.</b> IR spectrum of ligand <b>1</b> .   | 3 |
| <b>Figure S2.</b> IR spectrum of ligand <b>2</b>     | 4 |
| <b>Figure S3.</b> IR spectrum of ligand <b>3</b>     | 4 |
| <b>Figure S4.</b> IR spectrum of ligand <b>4</b>     | 5 |
| <b>Figure S5.</b> IR spectrum of compound <b>5</b>   | 5 |
| <b>Figure S6.</b> IR spectrum of compound <b>6</b> . | 6 |
| <b>Figure S7.</b> IR spectrum of compound <b>7</b>   | 6 |
| <b>Figure S8.</b> IR spectrum of compound <b>8</b>   | 7 |

|                                                                                                                                                                                                                    |    |
|--------------------------------------------------------------------------------------------------------------------------------------------------------------------------------------------------------------------|----|
| <b>Figure S9.</b> $^1\text{H}$ NMR Spectrum in DMSO- $d_6$ of ligand <b>1</b> .                                                                                                                                    | 8  |
| <b>Figure S10.</b> $^{13}\text{C}$ { $^1\text{H}$ } NMR Spectrum in DMSO- $d_6$ of ligand <b>1</b> .                                                                                                               | 8  |
| <b>Figure S11.</b> $^1\text{H}$ NMR Spectrum in acetone- $d_6$ of ligand <b>2</b> .                                                                                                                                | 9  |
| <b>Figure S12.</b> $^{13}\text{C}$ { $^1\text{H}$ } NMR Spectrum in acetone- $d_6$ of ligand <b>2</b> .                                                                                                            | 9  |
| <b>Figure S13.</b> $^1\text{H}$ NMR Spectrum in DMSO- $d_6$ of ligand <b>3</b> .                                                                                                                                   | 10 |
| <b>Figure S14.</b> $^{13}\text{C}$ { $^1\text{H}$ } NMR Spectrum in DMSO- $d_6$ of ligand <b>3</b> .                                                                                                               | 10 |
| <b>Figure S15.</b> High resolution mass spectroscopy of ligand <b>3</b> , Chemical Formula:<br>$\text{C}_{18}\text{H}_{15}\text{N}_2\text{O}$ , Calculated m/z: 275.117889. Found 275.1180 (PPM error: 0.644536)   | 11 |
| <b>Figure S16.</b> $^1\text{H}$ NMR Spectrum in DMSO- $d_6$ of ligand <b>4</b> .                                                                                                                                   | 12 |
| <b>Figure S17.</b> $^{13}\text{C}$ { $^1\text{H}$ } NMR Spectrum in DMSO- $d_6$ of ligand <b>4</b> .                                                                                                               | 12 |
| <b>Figure S18.</b> High resolution mass spectroscopy of ligand <b>4</b> . Chemical Formula:<br>$\text{C}_{22}\text{H}_{17}\text{N}_2\text{O}$ , Calculated m/z: 325.133539. Found 325.133678 (PPM error: 0.425190) | 13 |
| <b>Figure S19.</b> $^1\text{H}$ NMR Spectrum in acetone- $d_6$ of compound <b>5</b> .                                                                                                                              | 14 |
| <b>Figure S20.</b> $^{13}\text{C}$ { $^1\text{H}$ } NMR Spectrum in Acetone- $d_6$ of compound <b>5</b> .                                                                                                          | 14 |
| <b>Figure S21.</b> $^1\text{H}$ NMR Spectrum in $\text{CDCl}_3$ of compound <b>6</b> .                                                                                                                             | 15 |
| <b>Figure S22.</b> $^{13}\text{C}$ { $^1\text{H}$ } NMR Spectrum in $\text{CDCl}_3$ of compound <b>6</b> .                                                                                                         | 15 |
| <b>Figure S23.</b> { $^1\text{H}$ } NMR Spectrum in $\text{CDCl}_3$ of compound <b>6</b> .                                                                                                                         | 16 |
| <b>Figure S24.</b> $^1\text{H}$ NMR Spectrum in $\text{CDCl}_3$ of compound <b>7</b> .                                                                                                                             | 16 |
| <b>Figure S25.</b> $^{13}\text{C}$ { $^1\text{H}$ } NMR Spectrum in $\text{CDCl}_3$ of compound <b>7</b> .                                                                                                         | 17 |
| <b>Figure S26.</b> $^{11}\text{B}$ { $^1\text{H}$ } NMR Spectrum in $\text{CDCl}_3$ of compound <b>7</b> .                                                                                                         | 17 |
| <b>Figure S27.</b> $^1\text{H}$ NMR Spectrum in $\text{CDCl}_3$ of compound <b>8</b> .                                                                                                                             | 18 |
| <b>Figure S28.</b> $^{13}\text{C}$ { $^1\text{H}$ } NMR Spectrum in $\text{CDCl}_3$ of compound <b>8</b> .                                                                                                         | 18 |
| <b>Figure S29.</b> $^{11}\text{B}$ { $^1\text{H}$ } NMR Spectrum in $\text{CDCl}_3$ of compound <b>8</b> .                                                                                                         | 19 |
| <b>Figure S30.</b> ESI-MS spectrum of compound <b>5</b> .                                                                                                                                                          | 19 |
| <b>Figure S31.</b> ESI-MS spectrum of compound <b>6</b> .                                                                                                                                                          | 20 |
| <b>Figure S32.</b> ESI-MS spectrum of compound <b>7</b> .                                                                                                                                                          | 20 |
| <b>Figure S33.</b> ESI-MS spectrum of compound <b>8</b> .                                                                                                                                                          | 21 |
| <b>Figure S34.</b> Emission spectra of <b>1</b> .                                                                                                                                                                  | 21 |
| <b>Figure S35.</b> Pictures of fluorescent fibers pristine and after rubbing under UV light.                                                                                                                       | 22 |
| <b>Figure S36:</b> Video showing the fluorescent stained fiber was immersed in liquid nitrogen with compounds <b>5</b> (left) and <b>6</b> (right). Double-click to play.                                          | 22 |
| <b>Figure S37:</b> Video showing the fluorescent stained fiber was immersed in liquid nitrogen with compounds <b>7</b> (left) and <b>8</b> (right). Double-click to play.                                          | 23 |

**Table S1.** Synthesis parameters with ultrasonic radiation for the ligands and BOSCHIBAs, at room temperature.

| LIGANDS  | TIME    | YIELD | BOSCHIBAS | TIME    | YIELD |
|----------|---------|-------|-----------|---------|-------|
| <b>1</b> |         | 97%   | <b>5</b>  |         | 74%   |
| <b>2</b> | 2 hours | 93%   | <b>6</b>  | 4 hours | 85%   |
| <b>3</b> |         | 75%   | <b>7</b>  |         | 65%   |
| <b>4</b> |         | 91%   | <b>8</b>  |         | 89%   |

**Table S2.** Physical properties of Ligands and BOSCHIBAs

| LIGANDS  | COLOR  | P.F.  | BOSCHIBAS | COLOR  | P.F.  |
|----------|--------|-------|-----------|--------|-------|
| <b>1</b> | Yellow | 216°C | <b>5</b>  | Yellow | 180°C |
| <b>2</b> | Red    | 211°C | <b>6</b>  | Pink   | 191°C |
| <b>3</b> | White  | 151°C | <b>7</b>  | Yellow | 159°C |
| <b>4</b> | Yellow | 241°C | <b>8</b>  | Yellow | 251°C |

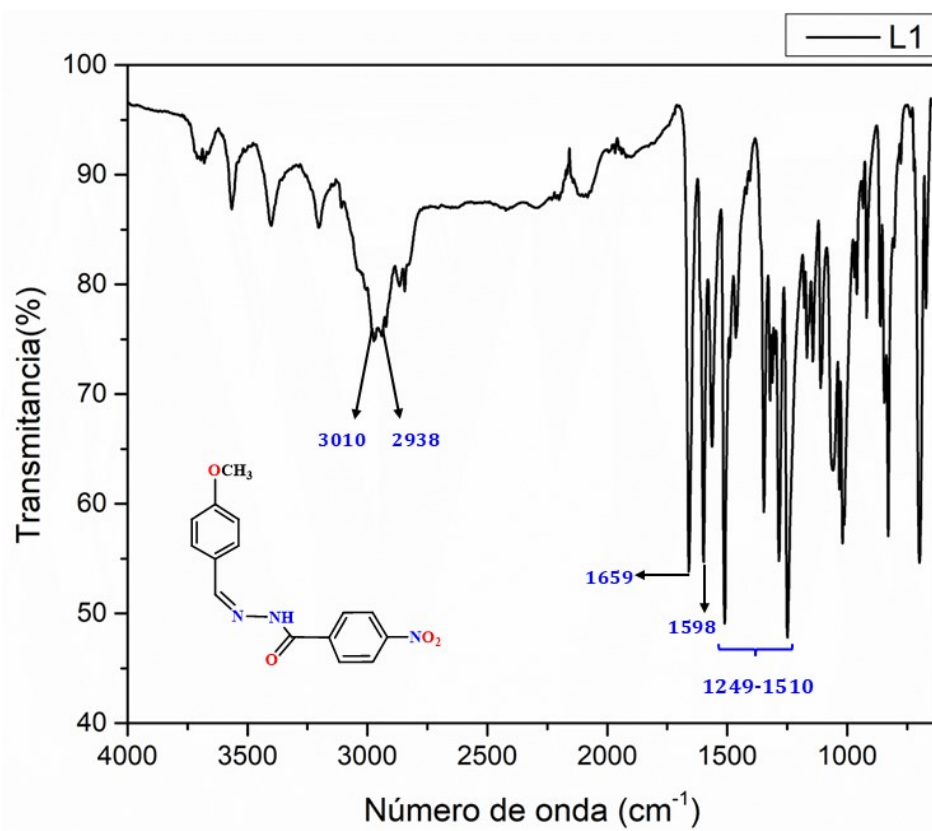

**Figure S1.** IR spectrum of ligand 1.

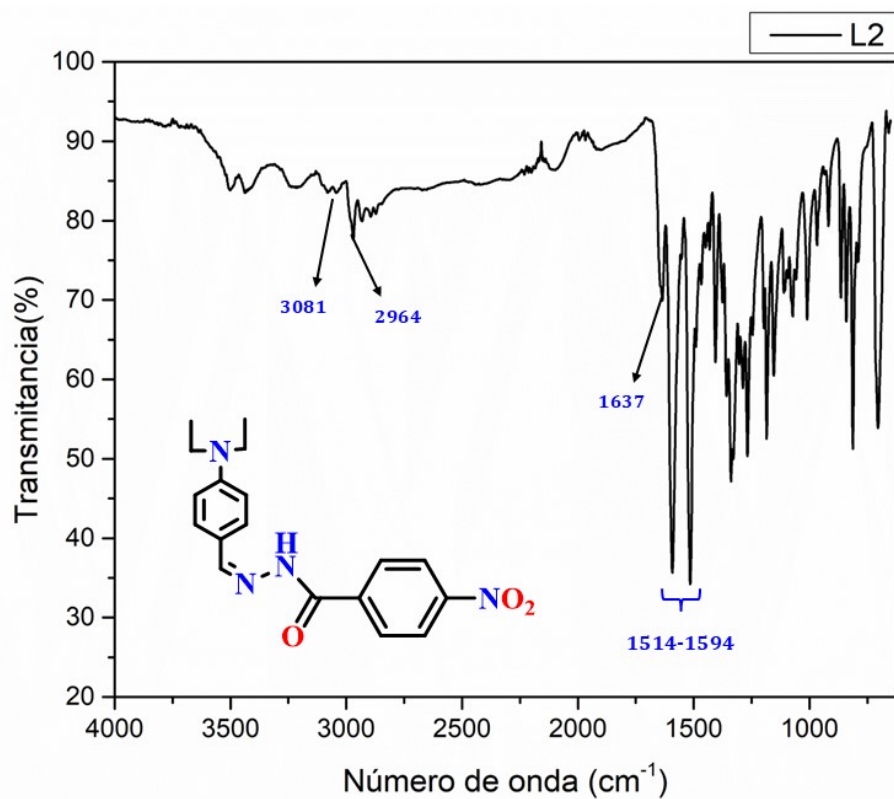

**Figure S2.** IR spectrum of ligand 2

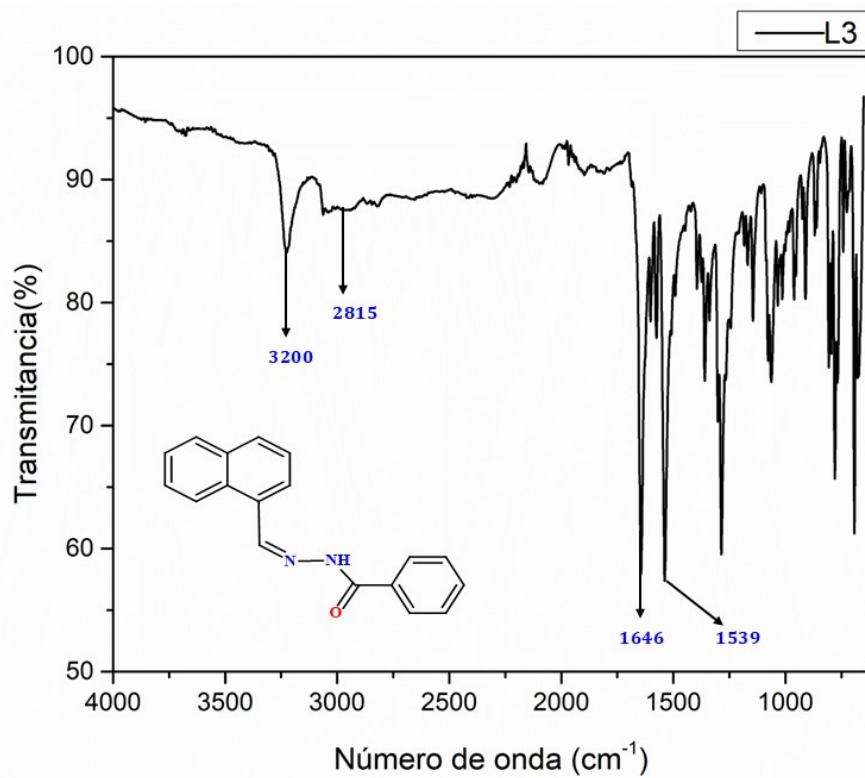

**Figure S3.** IR spectrum of ligand 3

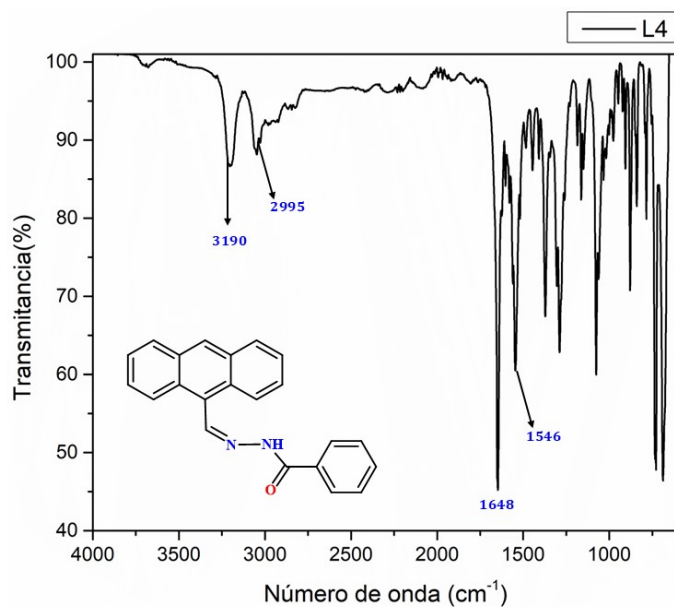

**Figure S4.** IR spectrum of ligand 4

**Table S3:** IR data in  $\text{cm}^{-1}$  for ligands 1-4

| Ligand | $\nu(\text{C}=\text{N})$ | $\nu(\text{C}=\text{O})$ | $\nu(\text{ES-NO}_2)$ | $\nu(\text{N-N})$ | $\nu(\text{C-Har})$ |
|--------|--------------------------|--------------------------|-----------------------|-------------------|---------------------|
| 1      | 1659                     | 1598                     | 1249-1510             | 2938              | 3010                |
| 2      | 1637                     | 1601                     | 1514-1594             | 2964              | 3081                |
| 3      | 1646                     | 1539                     |                       | 2815              | 3200                |
| 4      | 1648                     | 1546                     |                       | 2995              | 3190                |

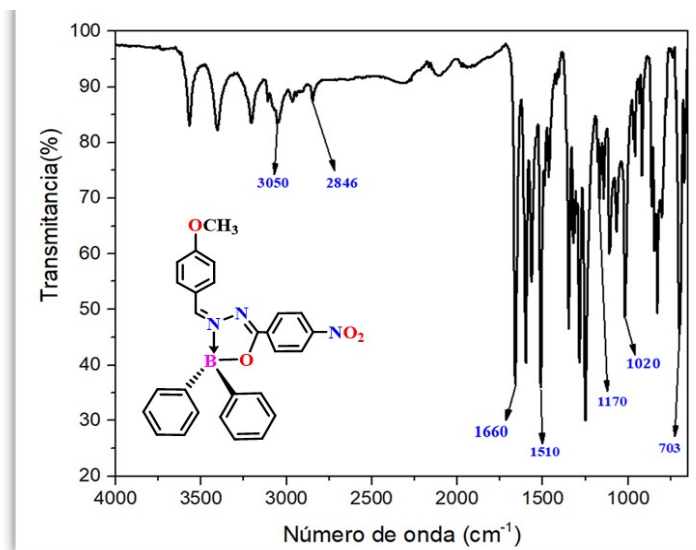

**Figure S5.** IR spectrum of compound 5



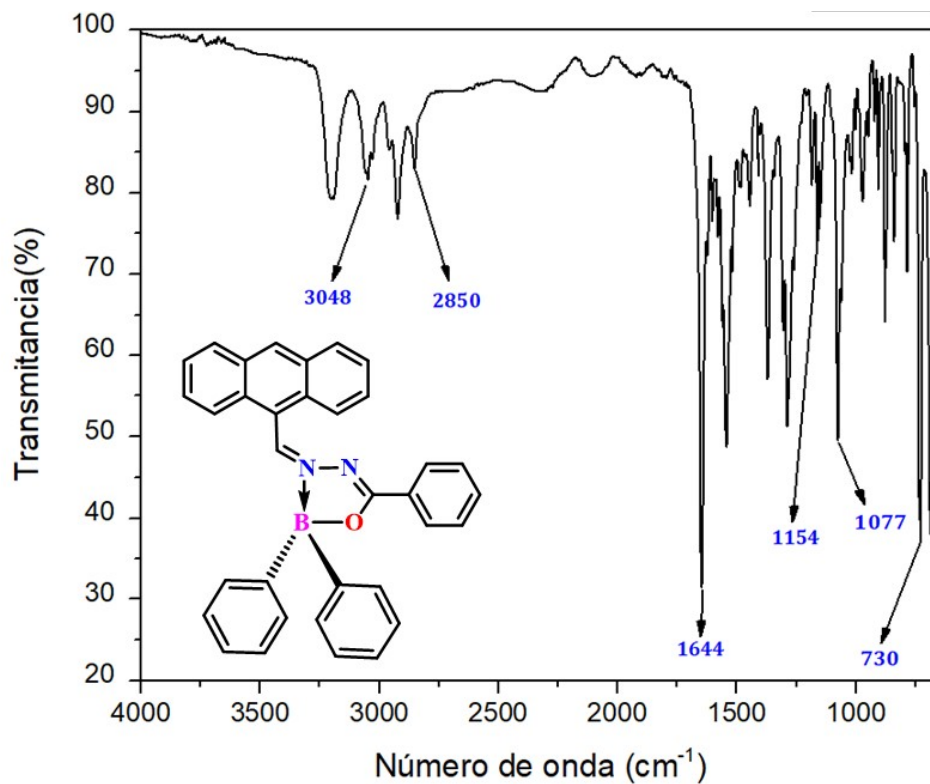

**Figure S8.** IR spectrum of compound **8**

**Table S4:** IR data in cm<sup>-1</sup> of compounds **5-8**

| <b>BOSCHIBAS</b> | $\nu(\text{C}=\text{N})$ | $\nu(\text{C}-\text{O})$ | $\nu(\text{ES}-\text{NO}_2)$ | $\nu(\text{N}-\text{N})$ | $\nu(\text{C}-\text{H}_{\text{AR}})$ | $\nu(\text{C}-\text{H}_{\text{AREP}})$ | $\nu(\text{C}-\text{H}_{\text{ARFP}})$ |
|------------------|--------------------------|--------------------------|------------------------------|--------------------------|--------------------------------------|----------------------------------------|----------------------------------------|
| <b>5</b>         | 1660                     | 1020                     | 1343-1510                    | 2846                     | 3050                                 | 1170                                   | 703                                    |
| <b>6</b>         | 1574                     | 1077                     | 1337-1518                    | 2910                     | 3012                                 | 1187                                   | 708                                    |
| <b>7</b>         | 1641                     | 1022                     | -                            | 2853                     | 3054                                 | 1257                                   | 696                                    |
| <b>8</b>         | 1644                     | 1077                     | -                            | 2850                     | 3048                                 | 1145                                   | 730                                    |

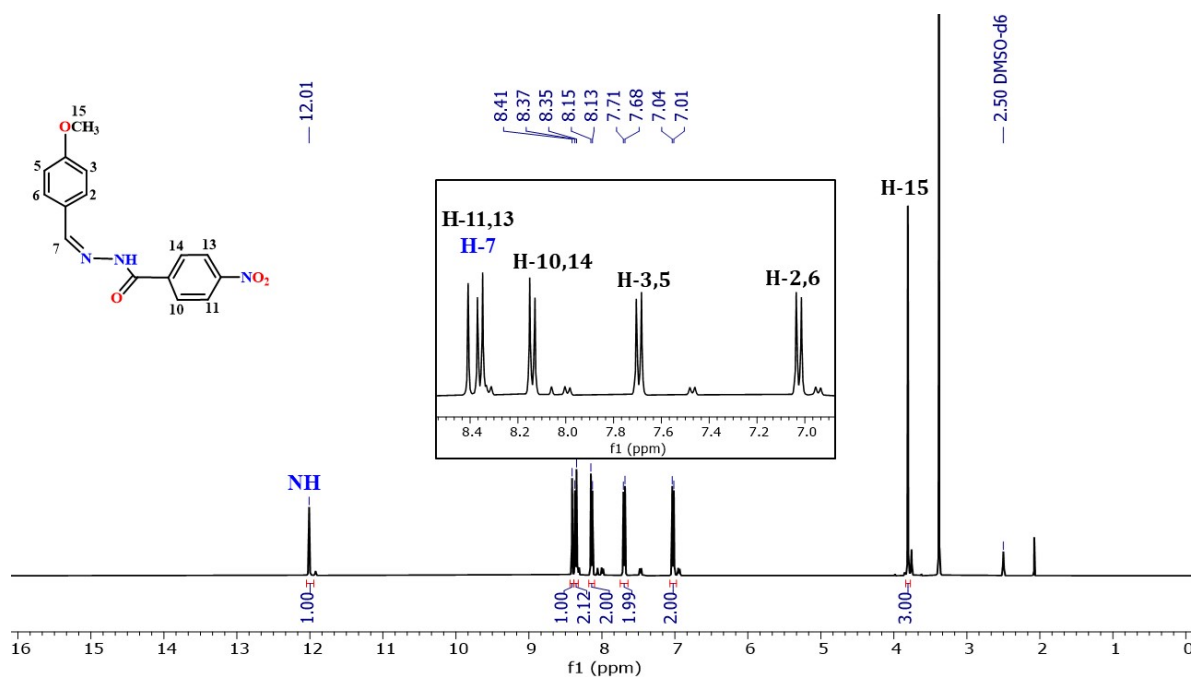

Figure S9. <sup>1</sup>H NMR Spectrum in DMSO-*d*<sub>6</sub> of ligand 1.

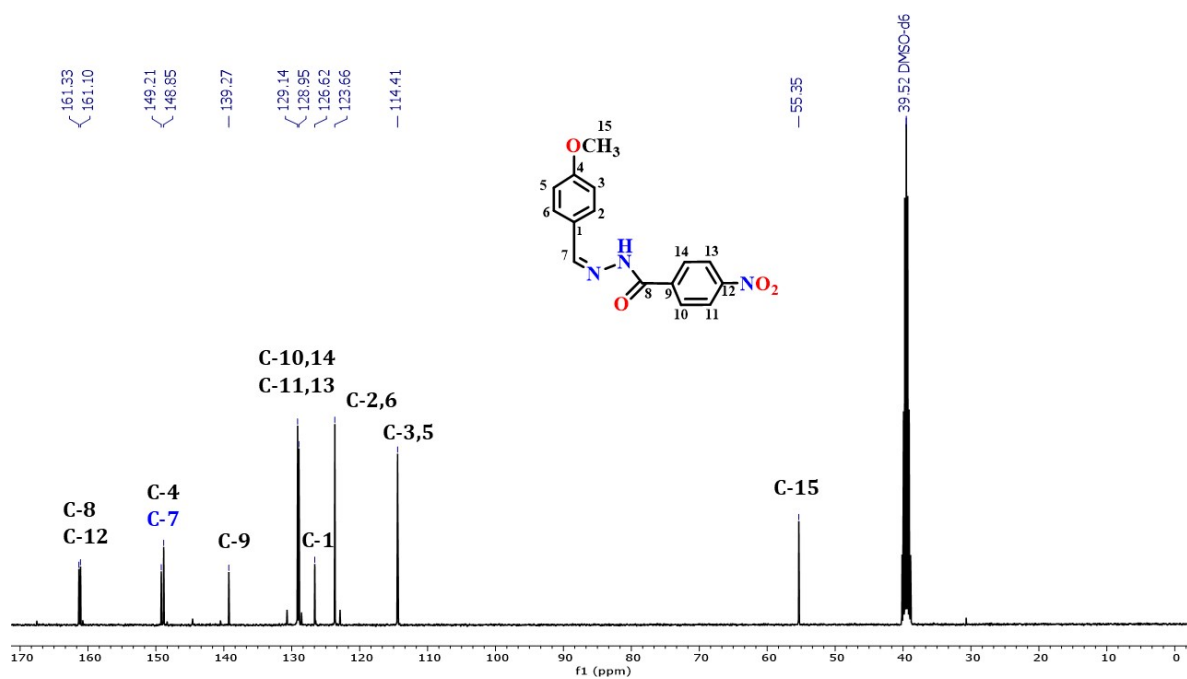

Figure S10. <sup>13</sup>C {<sup>1</sup>H} NMR Spectrum in DMSO-*d*<sub>6</sub> of ligand 1.

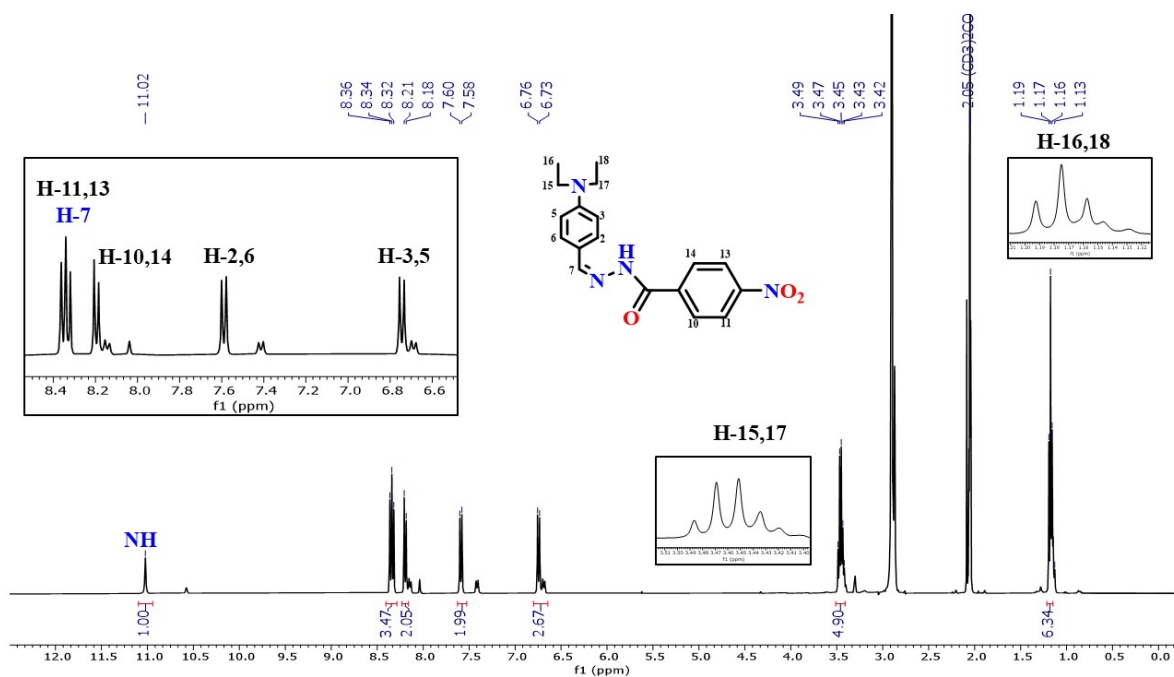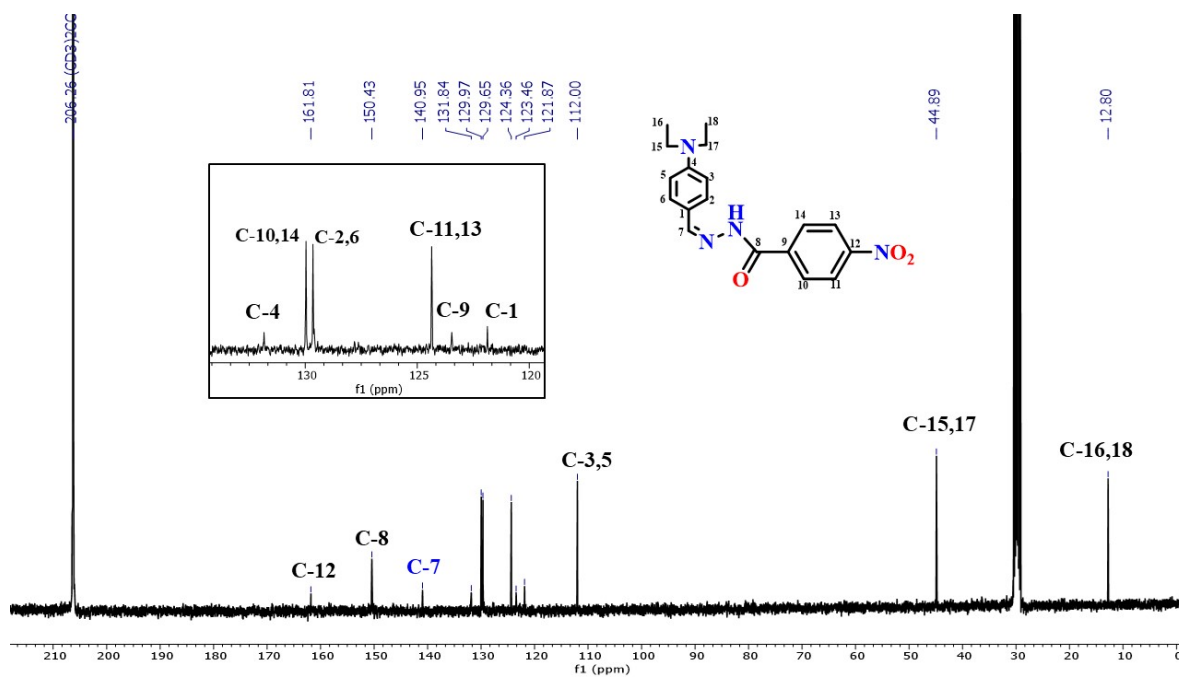

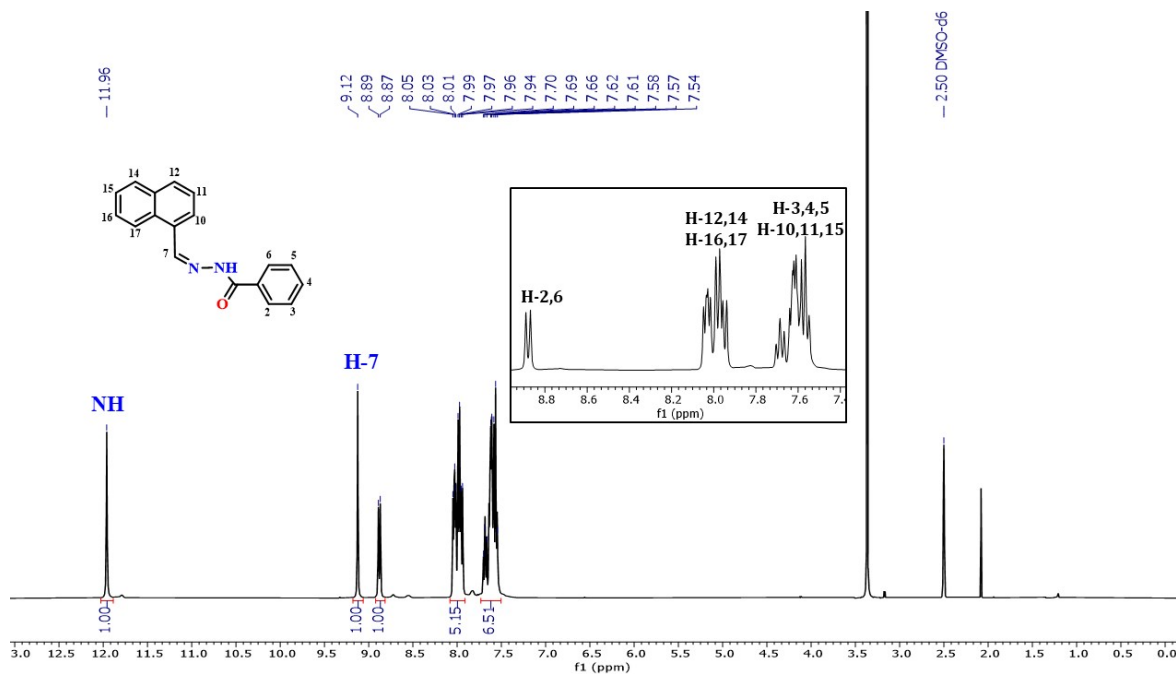

Figure S13.  $^1\text{H}$  NMR Spectrum in  $\text{DMSO-}d_6$  of ligand 3.

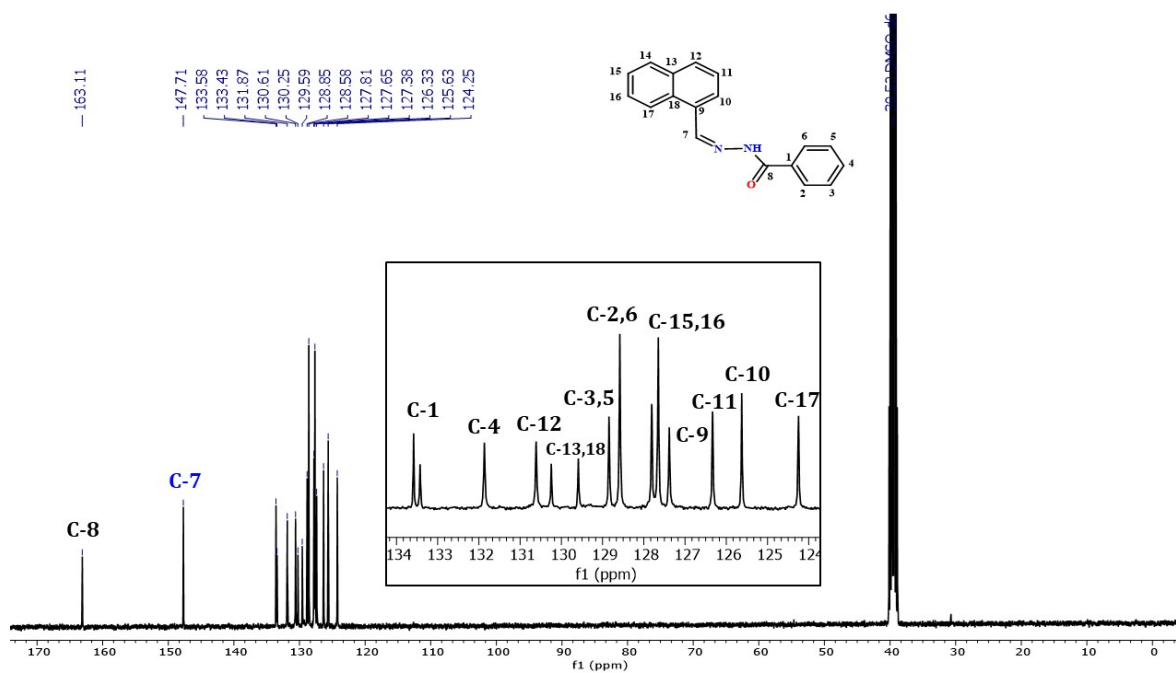

Figure S14.  $^{13}\text{C}$   $\{^1\text{H}\}$  NMR Spectrum in  $\text{DMSO-}d_6$  of ligand 3.

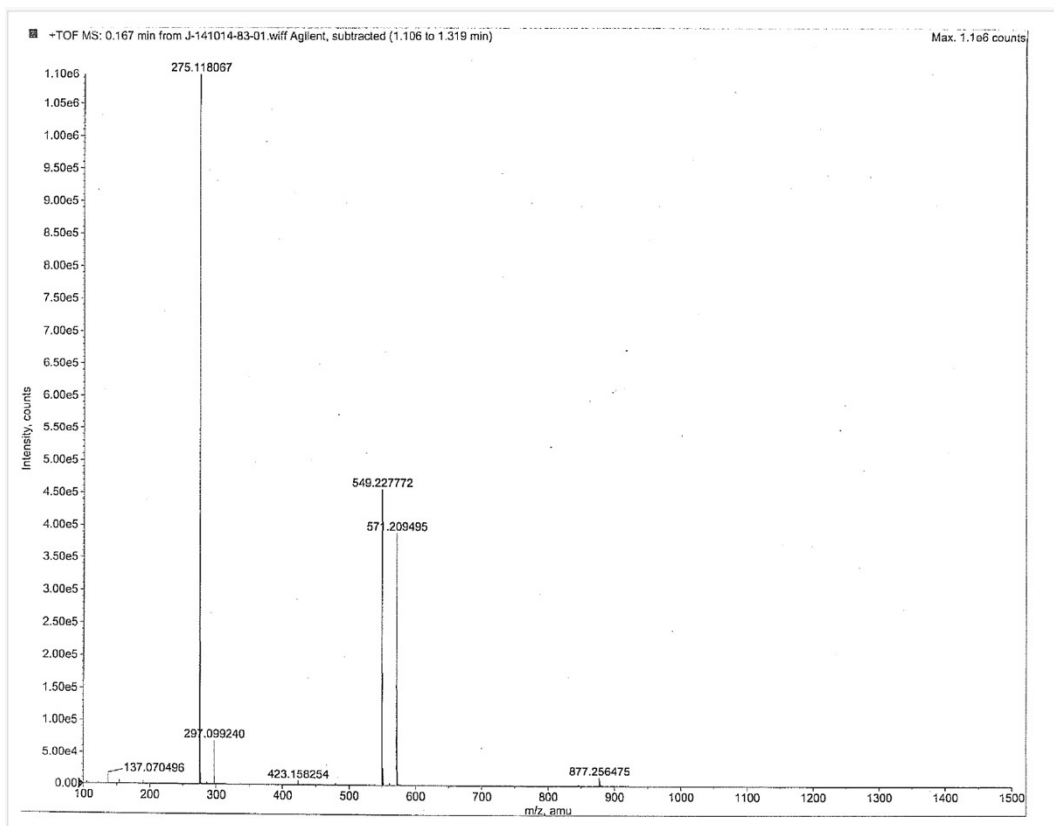

**Figure S15.** High resolution mass spectroscopy of ligand **3**, Chemical Formula:  $C_{18}H_{15}N_2O$ , Calculated  $m/z$ : 275.117889. Found 275.1180 (PPM error: 0.644536)

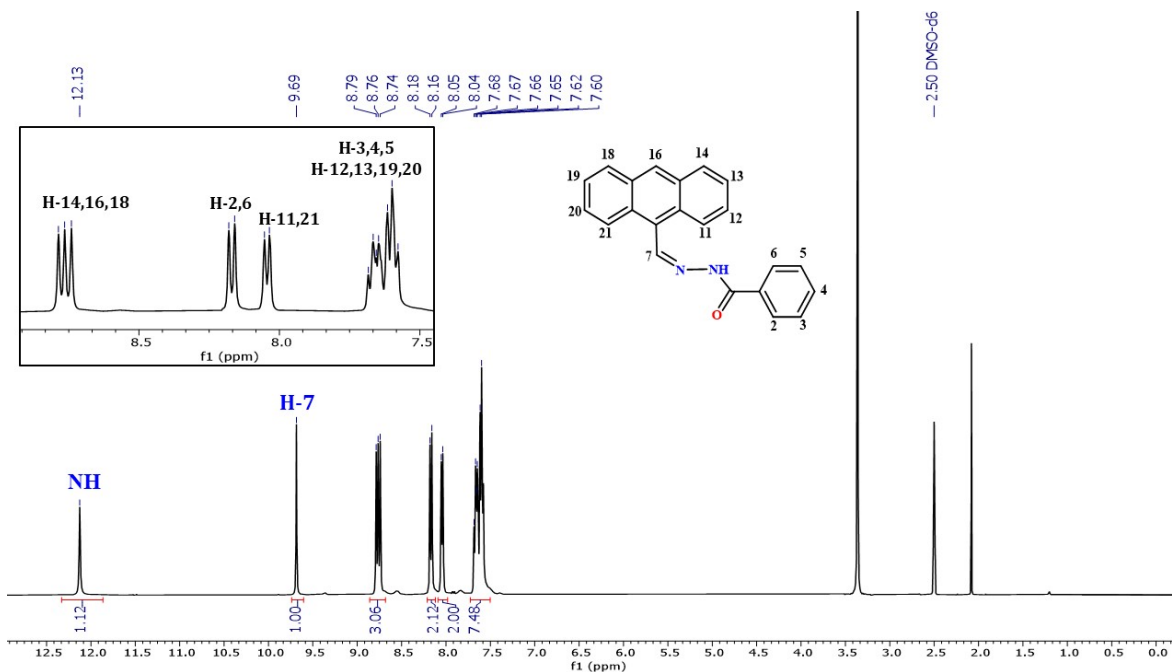

Figure S16.  $^1\text{H}$  NMR Spectrum in  $\text{DMSO-}d_6$  of ligand 4.

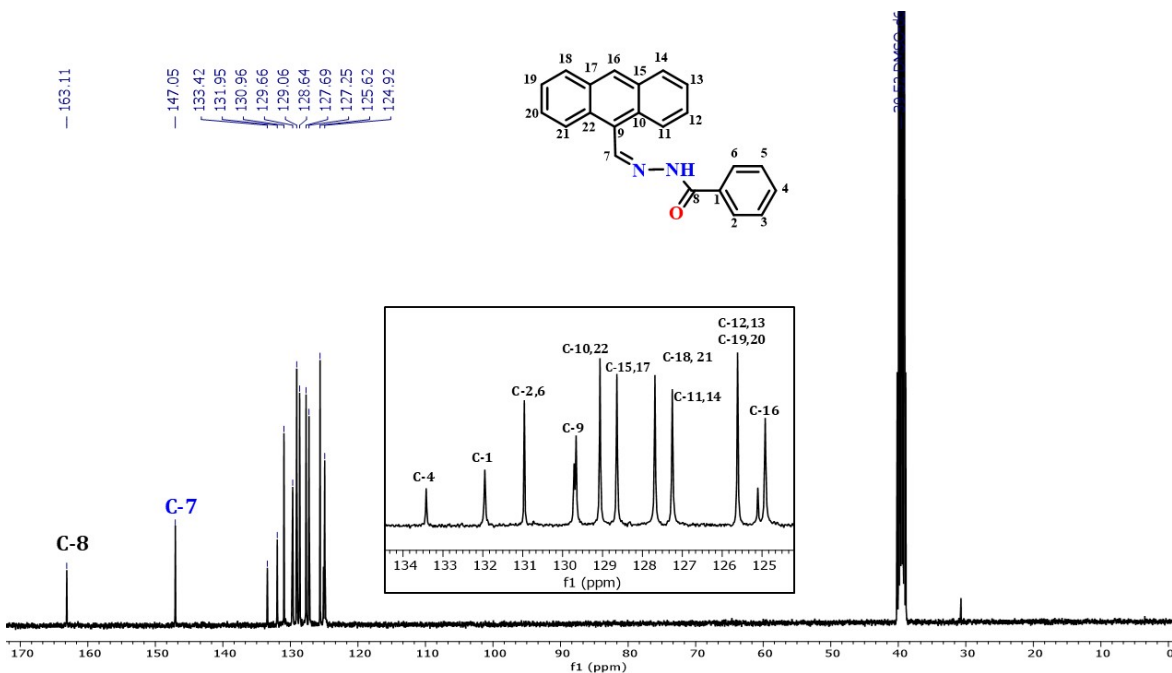

Figure S17.  $^{13}\text{C}$   $\{^1\text{H}\}$  NMR Spectrum in  $\text{DMSO-}d_6$  of ligand 4.

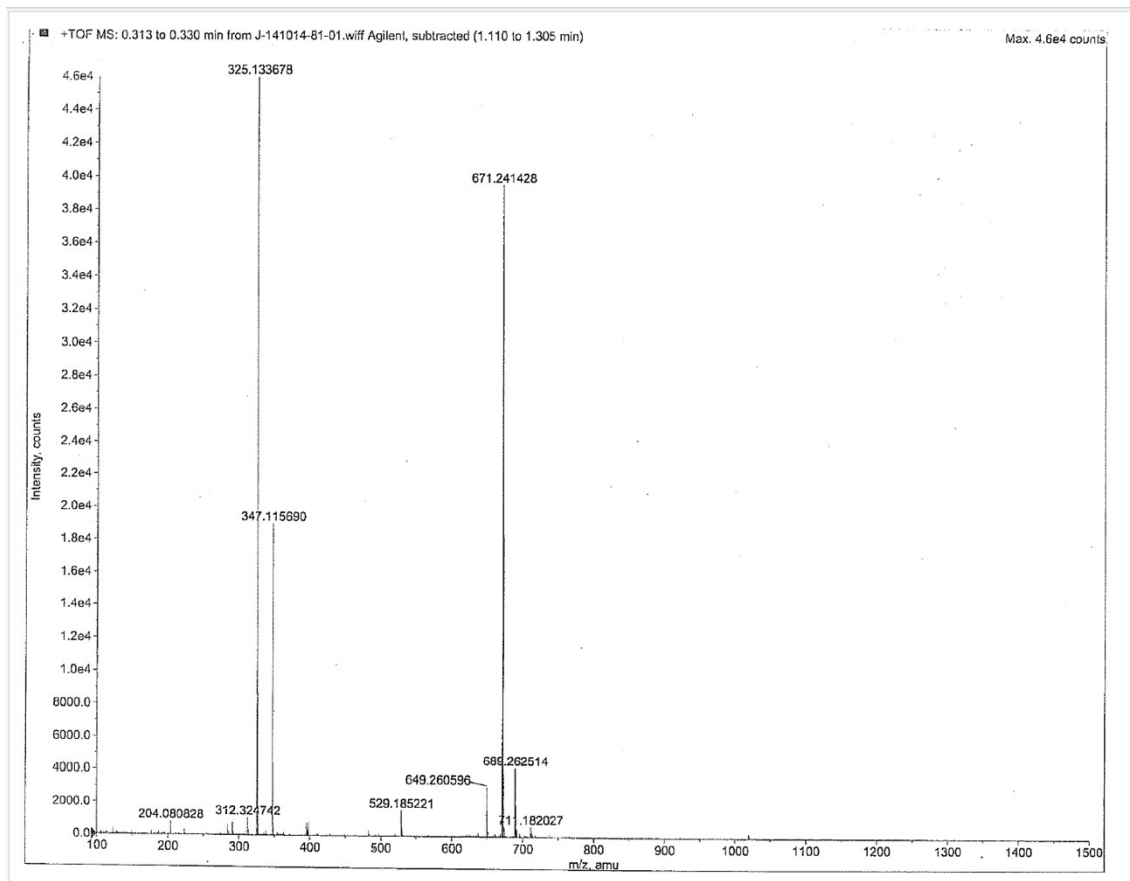

**Figure S18.** High resolution mass spectroscopy of ligand **4**. Chemical Formula:  $C_{22}H_{17}N_2O$ , Calculated  $m/z$ : 325.133539. Found 325.133678 (PPM error: 0.425190)

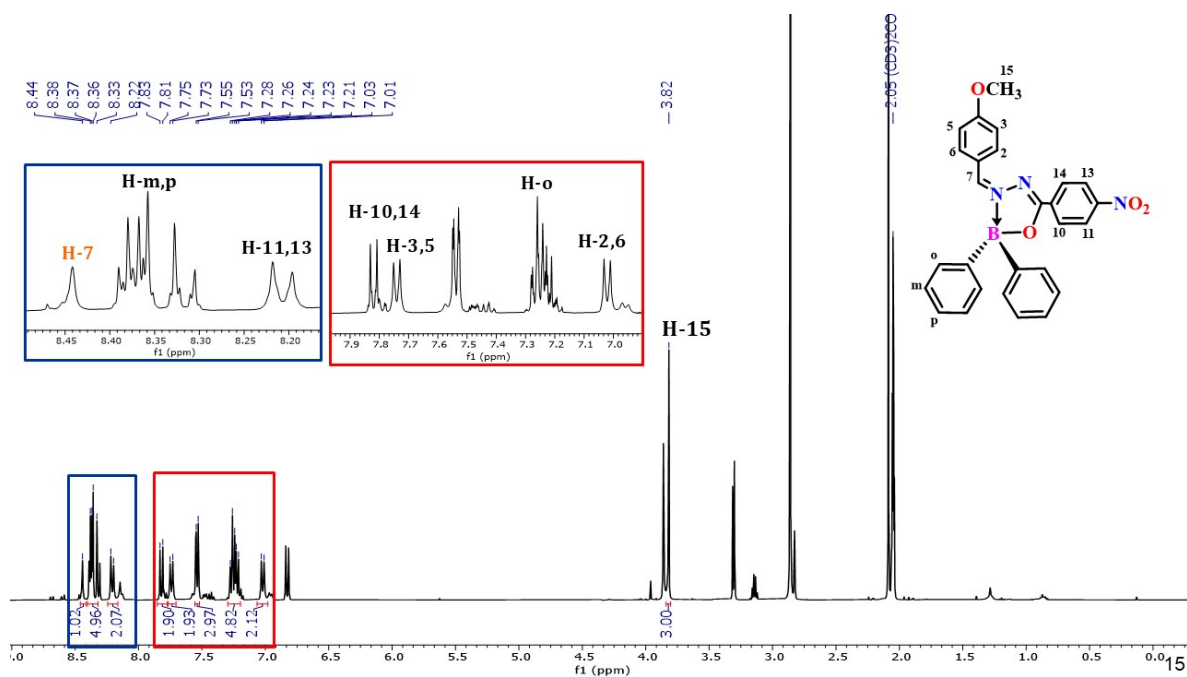

Figure S19.  $^1\text{H}$  NMR Spectrum in acetone- $d_6$  of compound **5**.

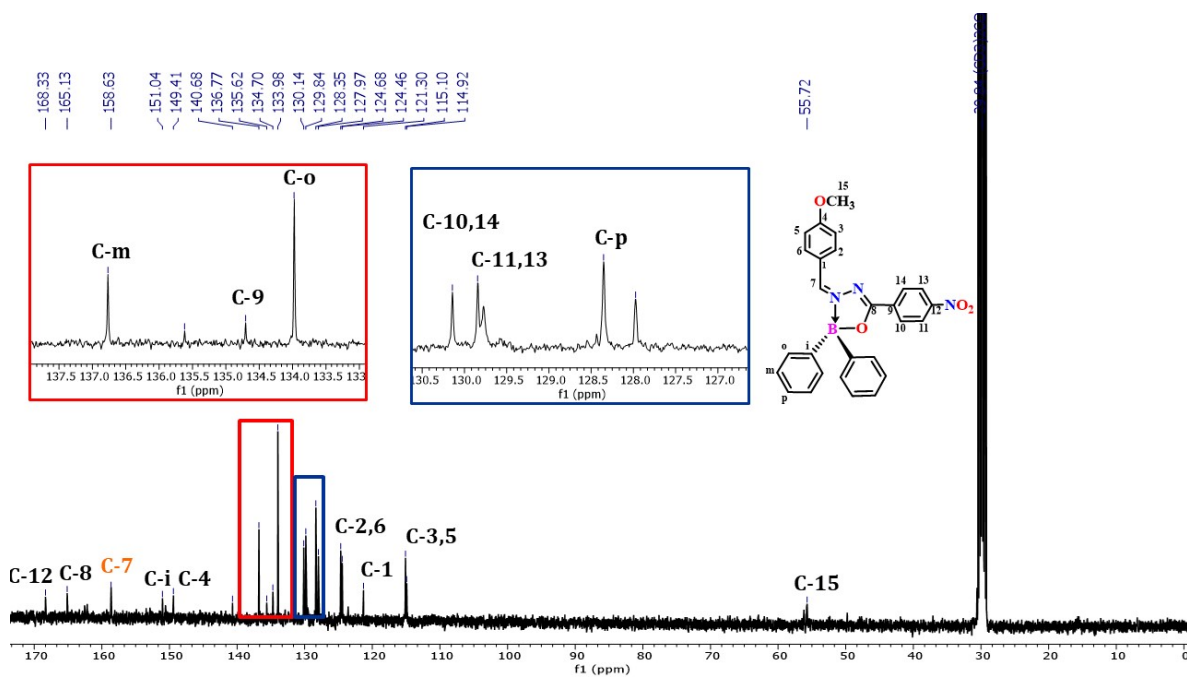

Figure S20.  $^{13}\text{C}$   $\{^1\text{H}\}$  NMR Spectrum in Acetone- $d_6$  of compound **5**.

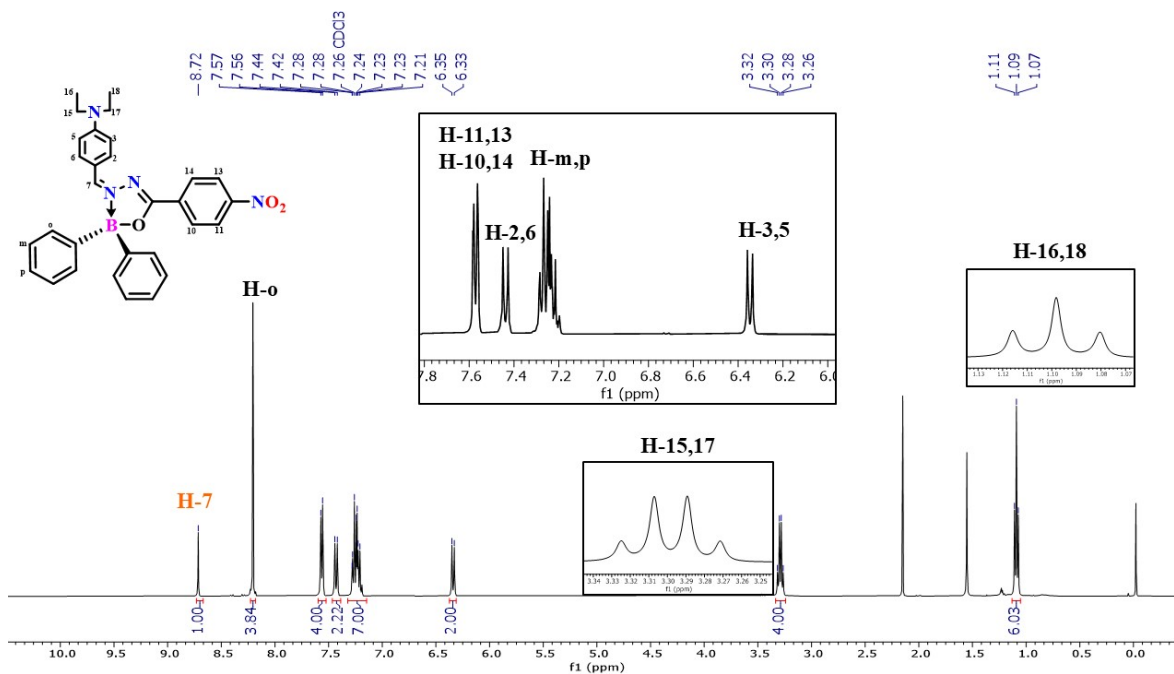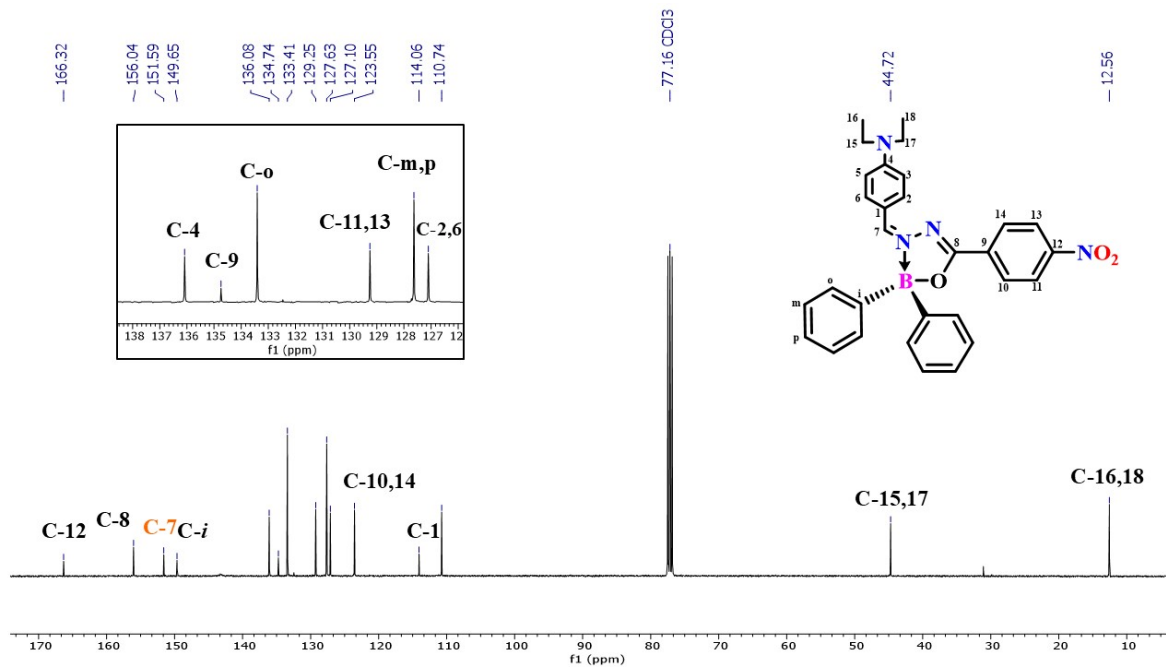

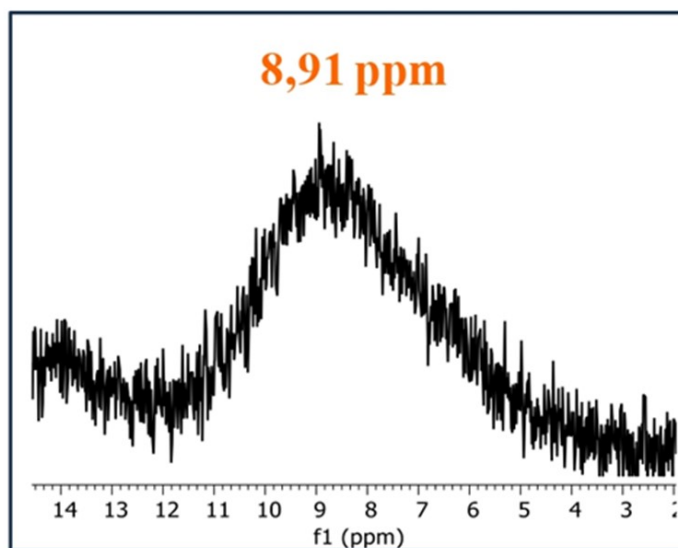

Figure S23.  $\{^1\text{H}\}$  NMR Spectrum in  $\text{CDCl}_3$  of compound 6.

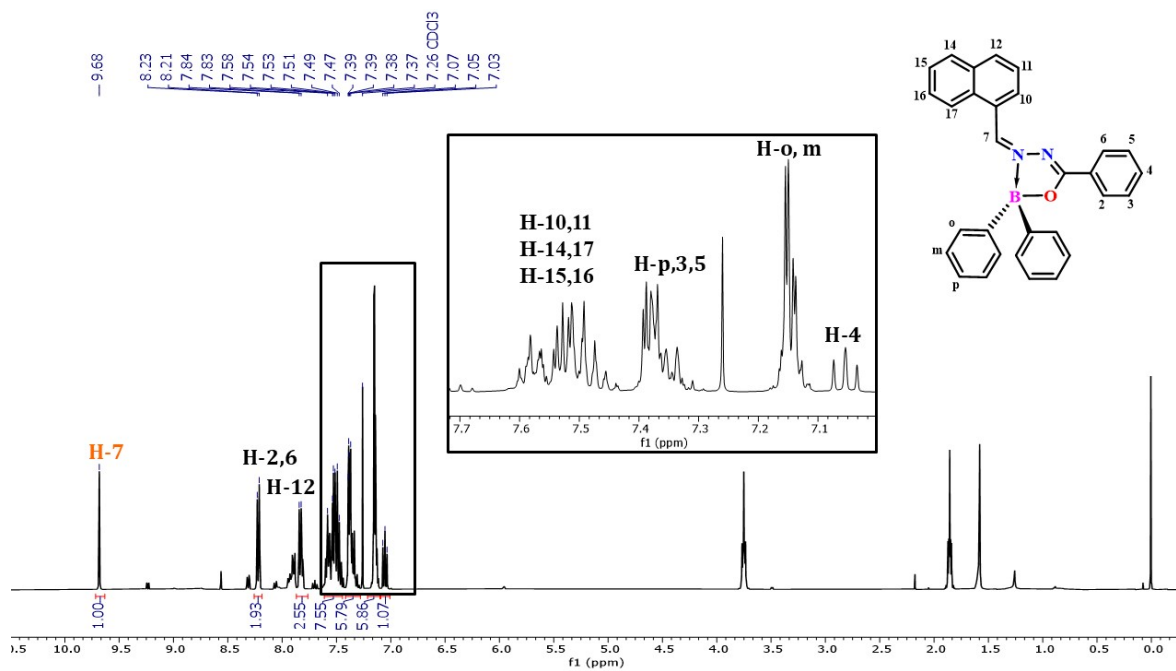

Figure S24.  $^1\text{H}$  NMR Spectrum in  $\text{CDCl}_3$  of compound 7.

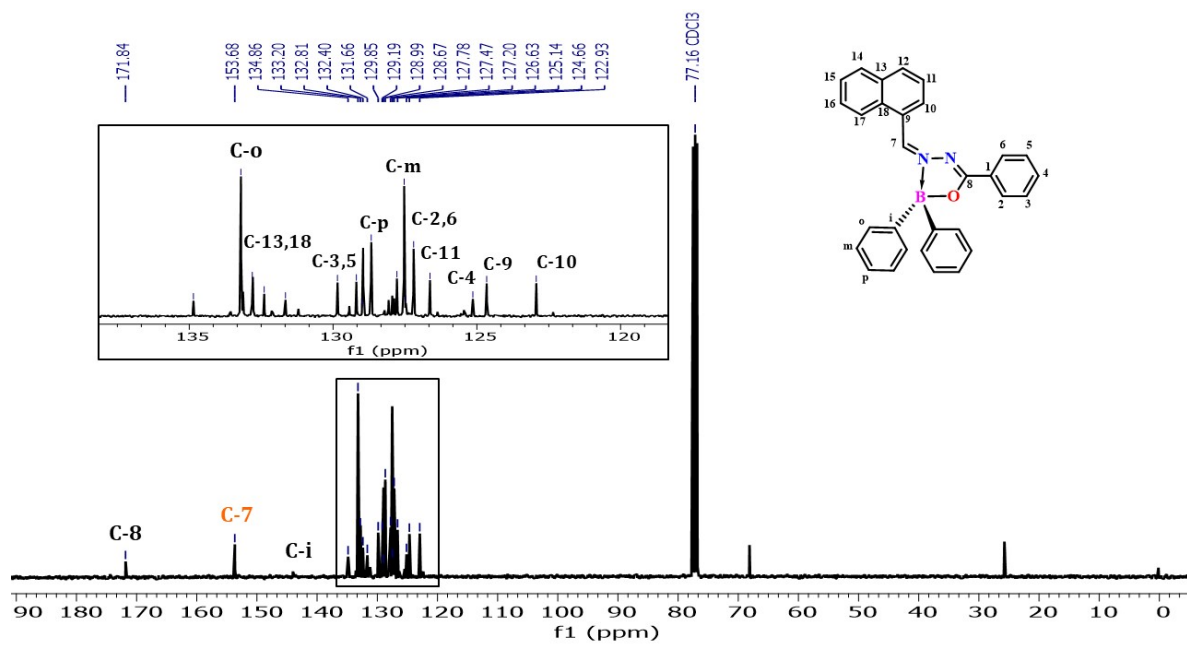

Figure S25.  $^{13}\text{C}$  { $^1\text{H}$ } NMR Spectrum in  $\text{CDCl}_3$  of compound 7.

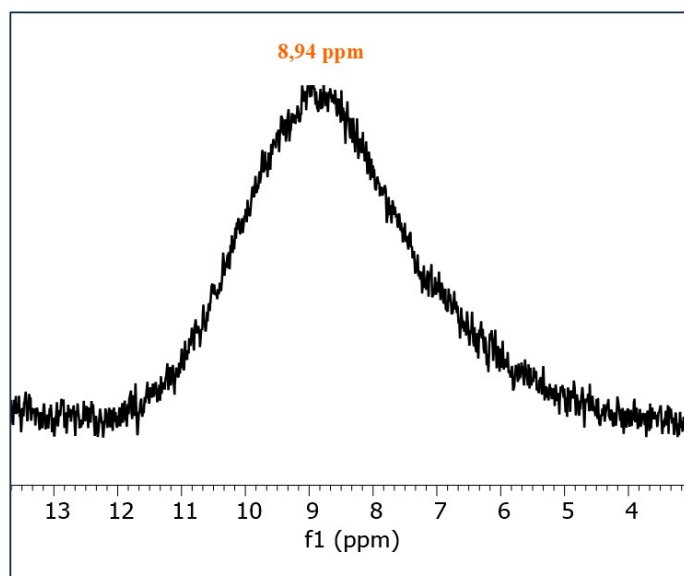

Figure S26.  $^{11}\text{B}$  { $^1\text{H}$ } NMR Spectrum in  $\text{CDCl}_3$  of compound 7.

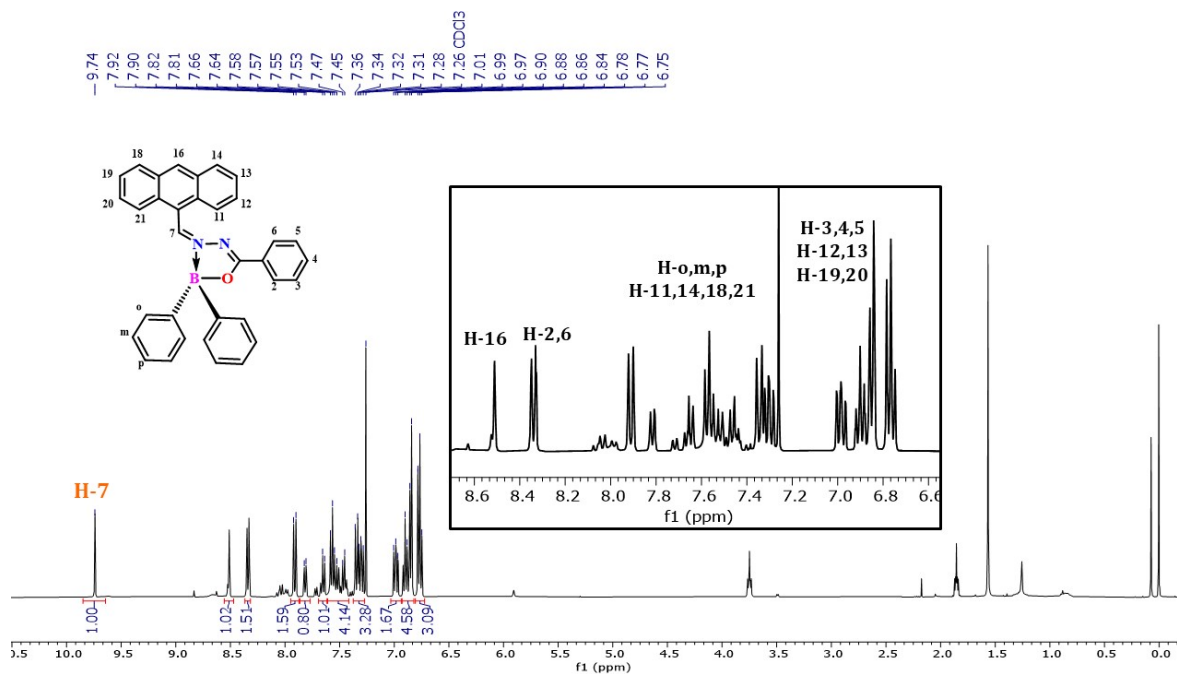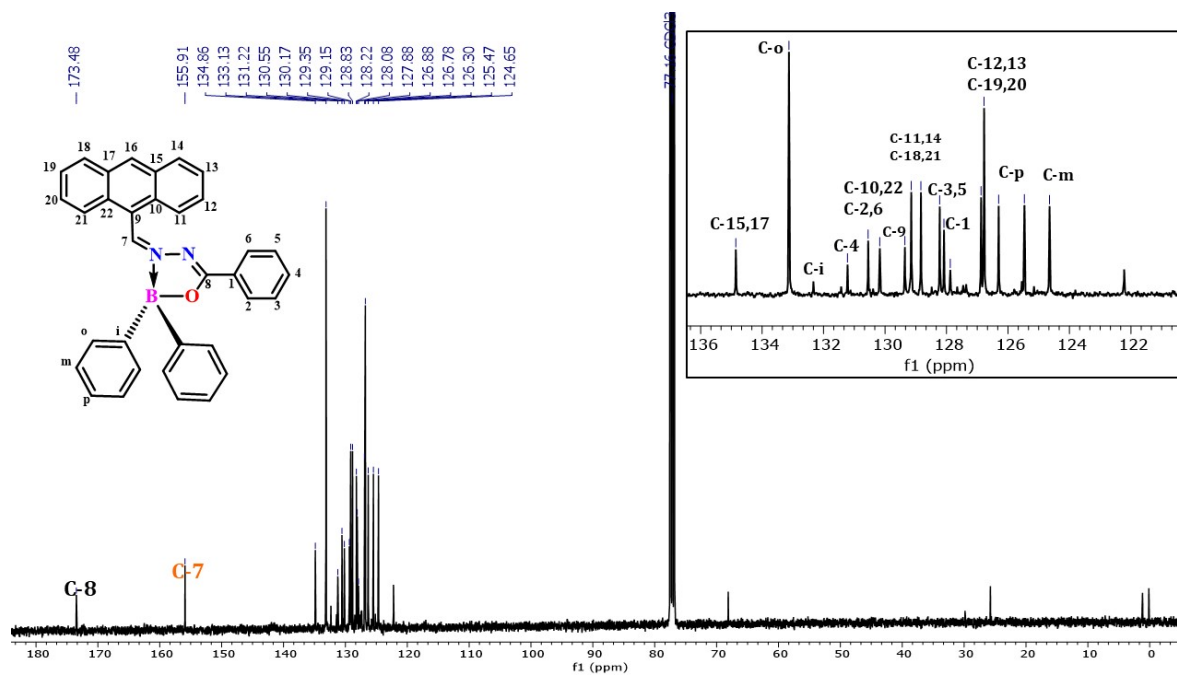

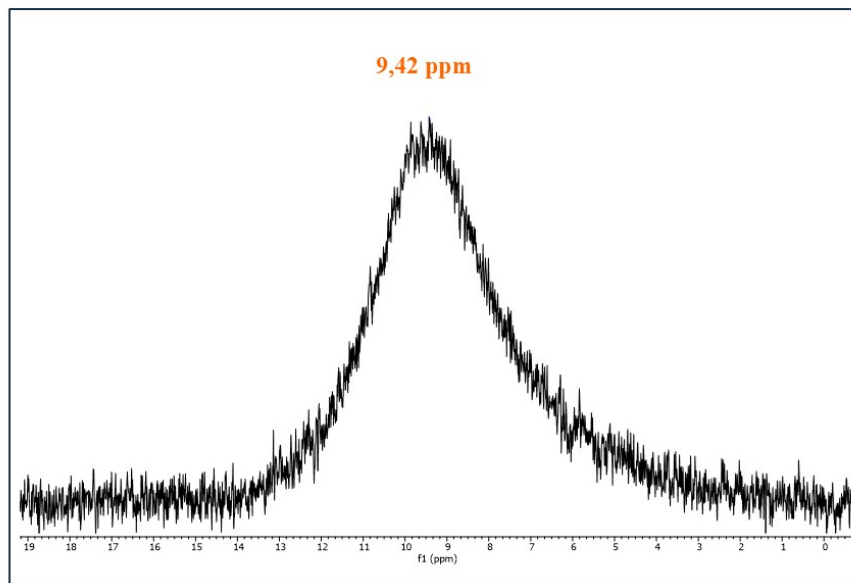

Figure S29.  $^{11}\text{B}$  { $^1\text{H}$ } NMR Spectrum in  $\text{CDCl}_3$  of compound **8**.

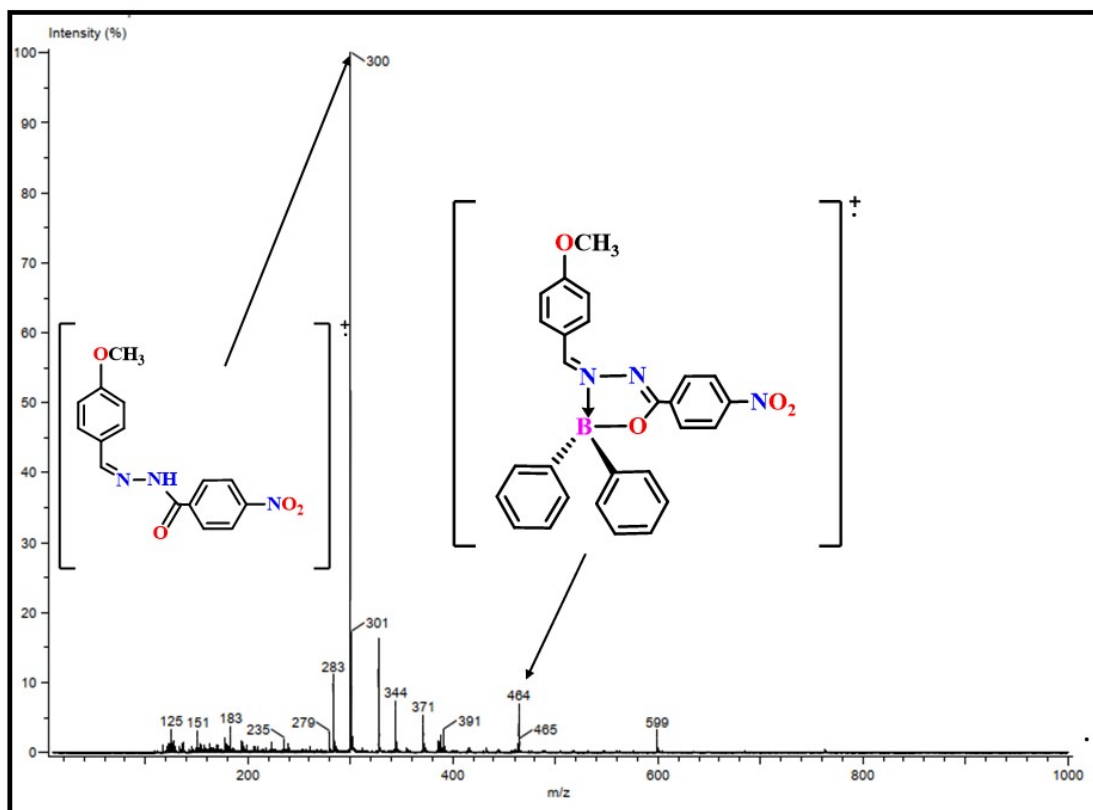

Figure S30. ESI-MS spectrum of compound **5**.

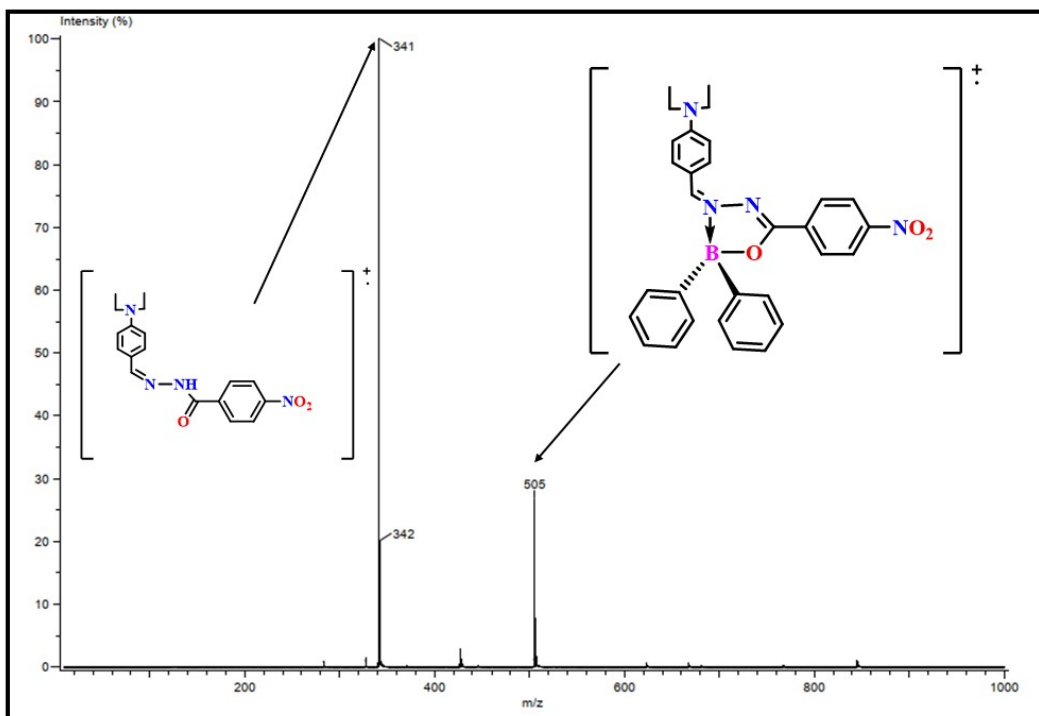

**Figure S31.** ESI-MS spectrum of compound 6.

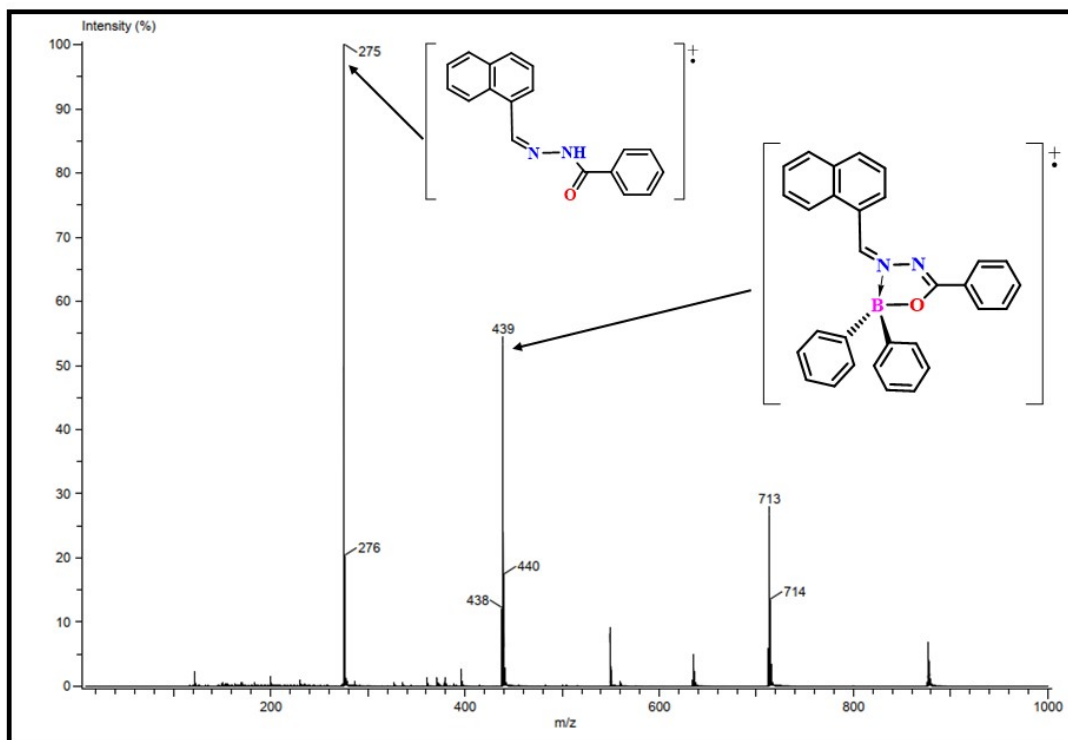

**Figure S32.** ESI-MS spectrum of compound 7.

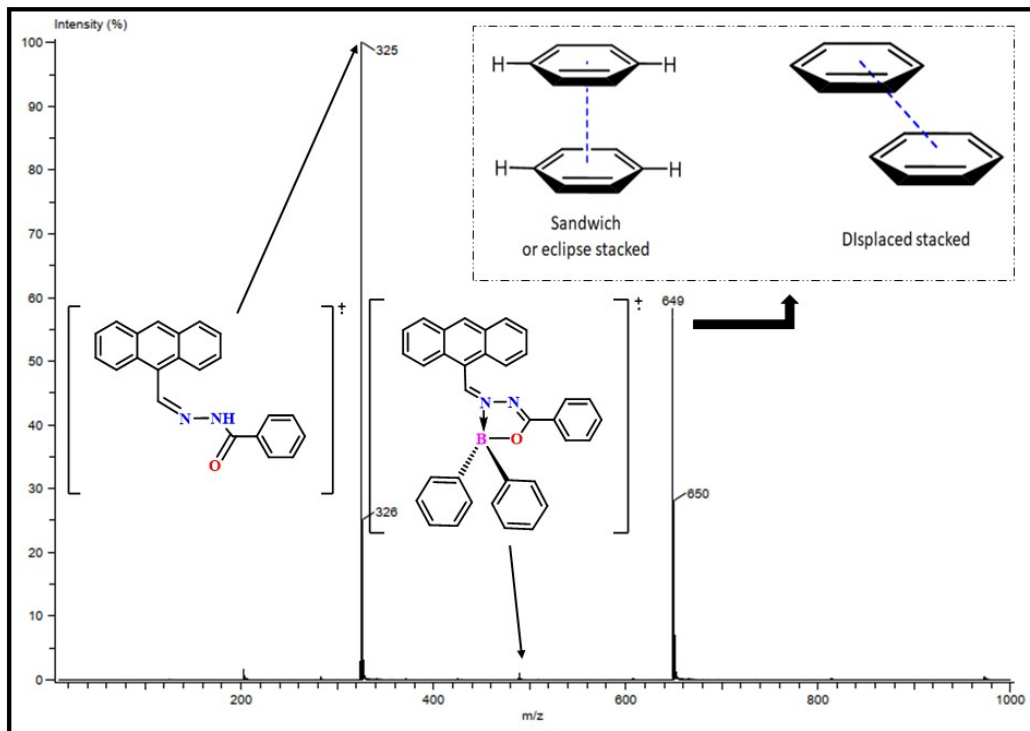

**Figure S33.** ESI-MS spectrum of compound **8**.

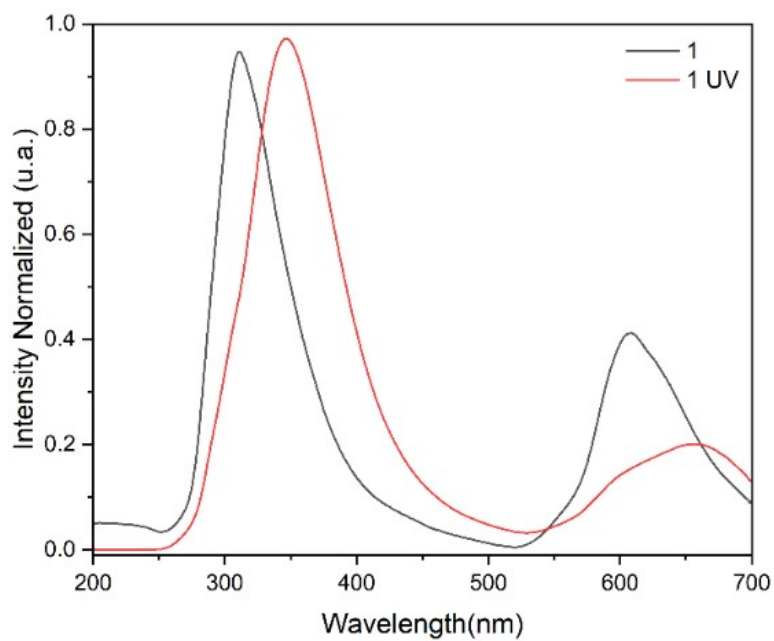

**Figure S34.** Emission spectra of **1**.

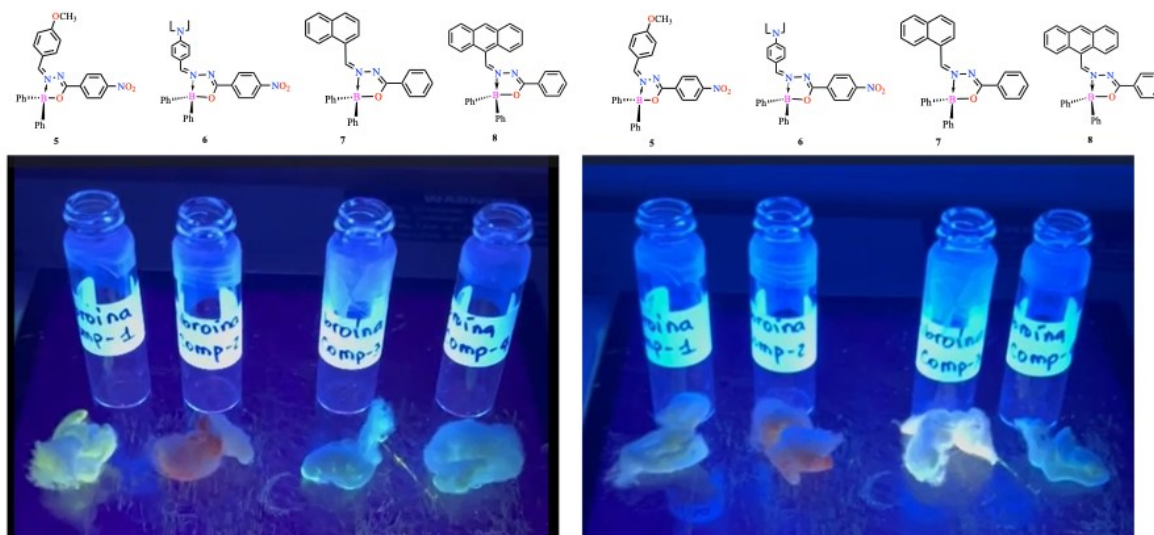

**Figure S35.** Pictures of fluorescent fibers pristine and after rubbing under UV lighth.

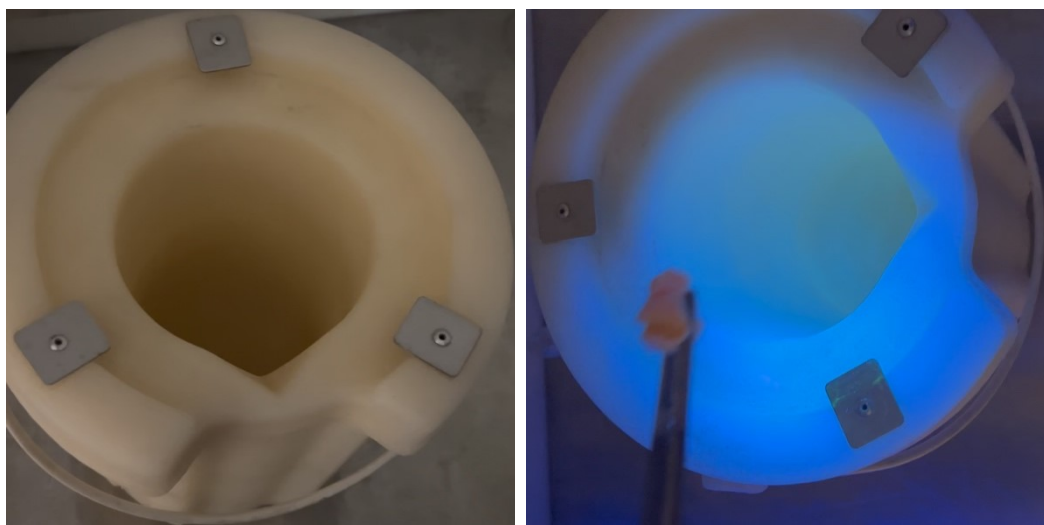

**Figure S36:** Video showing the fluorescent stained fiber was immersed in liquid nitrogen with compounds **5** (left) and **6** (right). Double-click to play.

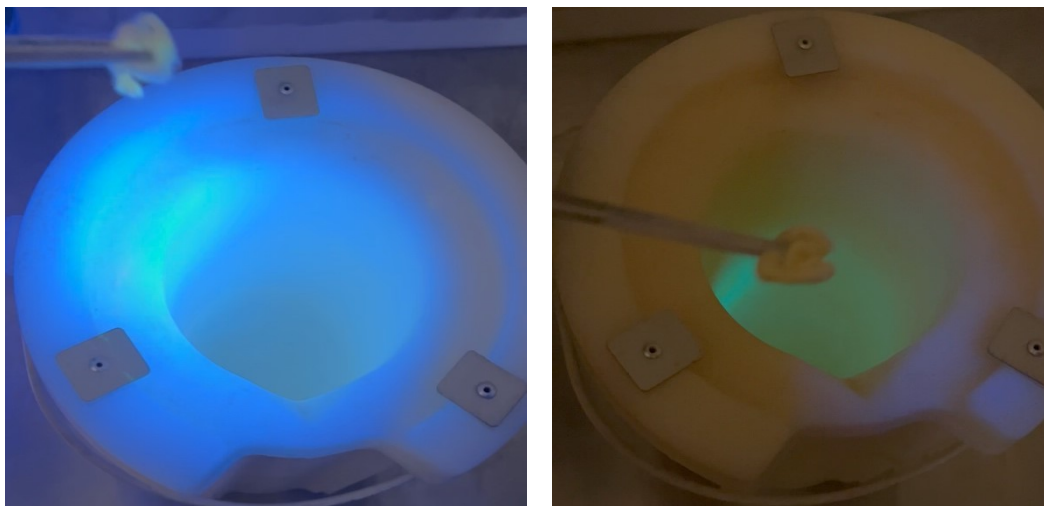

**Figure S37:** Video showing the fluorescent stained fiber was immersed in liquid nitrogen with compounds **7** (left) and **8** (right). Double-click to play.

**Table S5.** Crystal data for compound **5**

| <b>5</b>                                          |                                                                |
|---------------------------------------------------|----------------------------------------------------------------|
| Empirical formula                                 | C <sub>27</sub> H <sub>22</sub> BN <sub>3</sub> O <sub>4</sub> |
| Formula weight<br>(g/mol)                         | 463,30                                                         |
| Crystal system                                    | orthorhombic                                                   |
| Space group                                       | Pca2 <sub>1</sub>                                              |
| Temperature (K)                                   | 100(2)                                                         |
| a, (Å)                                            | 42,06(3)                                                       |
| b, (Å)                                            | 6,299(4)                                                       |
| c, (Å)                                            | 9,079(5)                                                       |
| α, (deg)                                          | 90                                                             |
| β, (deg)                                          | 90                                                             |
| γ, (deg)                                          | 90                                                             |
| Volume, (Å <sup>3</sup> )                         | 2405,7                                                         |
| Z                                                 | 4                                                              |
| Crystal Size, mm <sup>3</sup>                     | 0,190 x 0,210 x<br>0,220                                       |
| R <sub>1</sub> ,a wR <sub>2</sub> b (I<br>>2σ(I)) | 0.0595, 0.0502                                                 |
| R <sub>1</sub> ,a wR <sub>2</sub> b (all data)    | 0.0969, 0.4895                                                 |

**Table S6.** Selected bond distances (Å) and bond angles (°) of **5**

| <b>5</b>            |             |
|---------------------|-------------|
| <b>Bond lengths</b> |             |
| B(1)-O(1)           | 1,5203(13)  |
| B(1)-C(25)          | 1,5997(17)  |
| B(1)-C(19)          | 1,5984(17)  |
| B(1)-N(2)           | 1,6200(15)  |
| N(1)-N(2)           | 1,3972 (12) |
| <b>Bond angles</b>  |             |
| O(1)-B(1)-C(19)     | 110,14(9)   |
| O(1)-B(1)-C(25)     | 110,55(9)   |
| C(25)-B(1)-C(19)    | 117,64(9)   |
| O(1)-B(1)-N(2)      | 95,59(7)    |
| C(19)-B(1)-N(2)     | 111,51(9)   |
| C(25)-B(1)-N(2)     | 109,20(9)   |

### Quantum Yield Calculation

We have calculated Quantum yield with respect to quinine sulphate (QS) in 0.1 M H<sub>2</sub>SO<sub>4</sub>, using the following formula.<sup>1-2</sup>

$$Q_S = Q_R \left( \frac{I_S}{I_R} \right) \left( \frac{A_R}{A_S} \right) \left( \frac{\eta_S}{\eta_R} \right)^2$$

Where,

Q<sub>S</sub> = quantum yield of sample

Q<sub>R</sub> = quantum yield of reference

I<sub>S</sub> = area under PL curve of sample

I<sub>R</sub> = area under PL curve of reference

A<sub>R</sub> = absorbance of the reference

A<sub>S</sub> = absorbance of the sample

η<sub>S</sub> = refractive index of sample

η<sub>R</sub> = refractive index of reference.

Q.Y. of quinine sulphate = 0.54; Refractive Index: water = 1.33 (The concentration of all samples and the reference quinine sulphate were adjusted so that the optical densities of all samples were  $0.020 \pm 0.003$  at the excitation wavelength (365 nm)).

---

1.- Q. Zhang, Y. Gao, S. Zhang, J. Wu, H. Zhou, J. Yang, X. Tao, Y. Tian, *Dalton Trans*, **2012**, 41, 7067.

2.- J. E. Murphy, M. C. Beard, A. G. Norman, S. P. Ahrenkiel, J. C. Johnson, P. Yu, O. I. Micic, R. J. Ellingson, A. J. Nozik, *J. Am. Chem. Soc*, **2006**, 128, 3241
